# Supplementary material
Source: publisher figshare collection journal article supplement (https://aacr.figshare.com/articles/dataset/_/23668534)
Supplement: Supplementary file 1 [file 41536717]

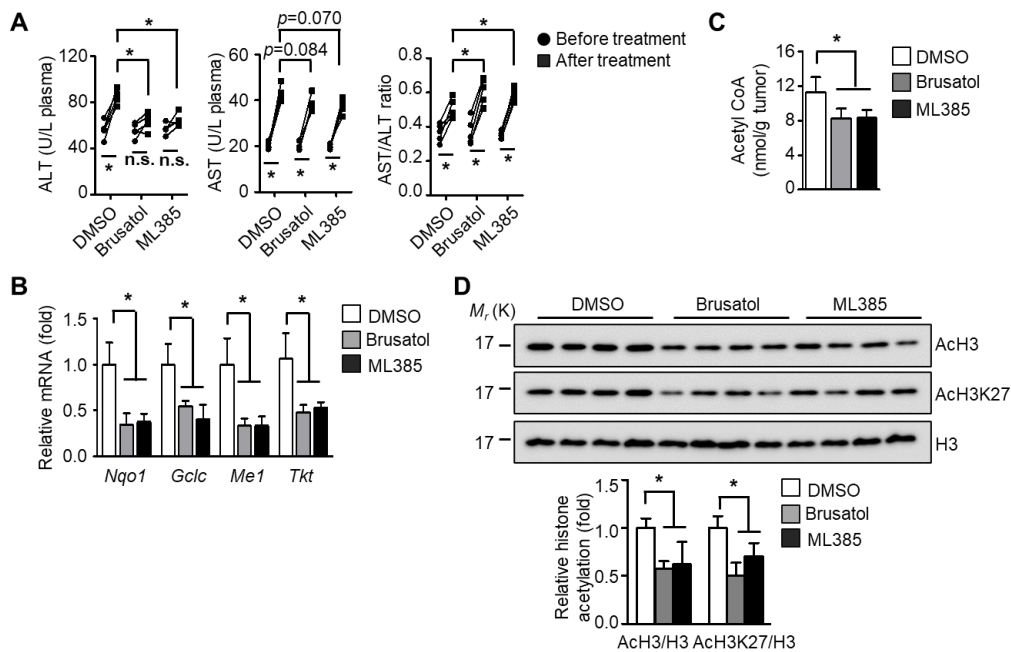

**Fig S8. Nrf2 suppression decreases mouse liver tumor progression.** Mice at 32-week post-DEN treatment of age were chronically treated with Brusatol (2 mg/kg), ML385 (30 mg/kg) or vehicle DMSO for 4 weeks. (A) Serum ALT and AST levels in mice before and after treatment. (B) mRNA levels of Nrf2 target genes in mouse liver tumors. (C-D) The levels of acetyl CoA (C) and histone acetylation (D) in mouse liver tumors. Data represent mean  $\pm$  SD (n=4 mice each treatment group). \* $p < 0.05$ .
